# Supplementary material
Source: ML conference proceedings conference paper supplement (https://openaccess.thecvf.com/content/ICCV2023/html/Kim_PODIA-3D_Domain_Adaptation_ICCV_2023_paper.html)
Supplement: Supplementary file 1 [file Kim_PODIA-3D_Domain_Adaptation_ICCV_2023_supplemental.zip]

Archive with 2 entries (2 files):
- ICCV2023_PODIA_3D_supplementary_paper.pdf
- ICCV2023_PODIA_3D_supplementary_video.mp4
